# Supplementary material for: Dissolvable and layered microneedles composed of hyaluronate/rbFGF/CPC effectively improve the treatment effect on recurrent aphthous ulcers
Source: Royal Society of Chemistry journal article supplement (doi:10.1039/d2nj00054g), 2022-01-01
Supplement: d2nj00054g1.pdf [file d2nj00054g1.pdf]

## Supplementary information

### **Dissolvable and layered microneedles composed of hyaluronate/rbFGF/CPC effectively improve the treatment effect on recurrent aphthous ulcers**

Zhengrong Yin<sup>1</sup>, Xiangli Zhang<sup>1</sup>, Yan Bai<sup>1</sup>, Yanwei Yang<sup>2\*</sup>, Bin Liu<sup>1\*</sup>, Zengjie Fan<sup>1\*</sup>

<sup>1</sup> Key Laboratory of Dental Maxillofacial Reconstruction and Biological Intelligence Manufacturing, Gansu Province, School of Stomatology, Lanzhou University, Lanzhou 730000, P.R. China.

<sup>2</sup> Department of Stomatology, The 940th Hospital of Joint Logistic Support Force of the Chinese People's Liberation Army, Lanzhou 730050, P.R. China

\*Corresponding authors: Yanwei Yang, email address: yangyanwei85@163.com. Bin Liu, email address: liubkq@lzu.edu.cn; Zengjie Fan, email address: zjfan@lzu.edu.cn;

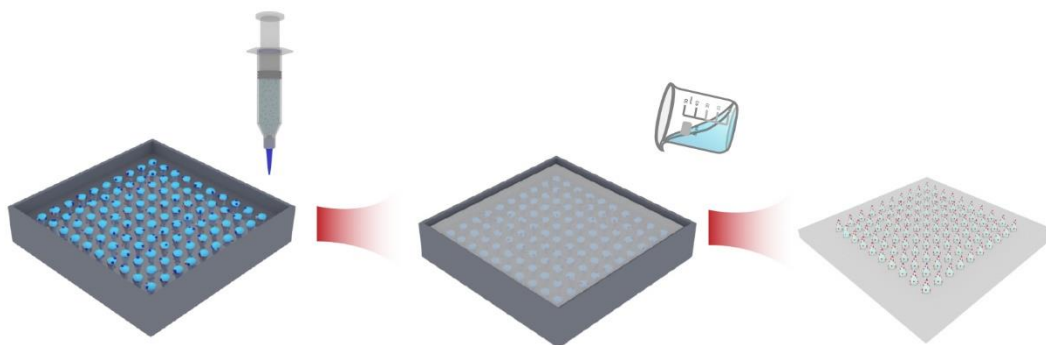

Fig. S1 Scheme of the fabrication process for HA MNs patch

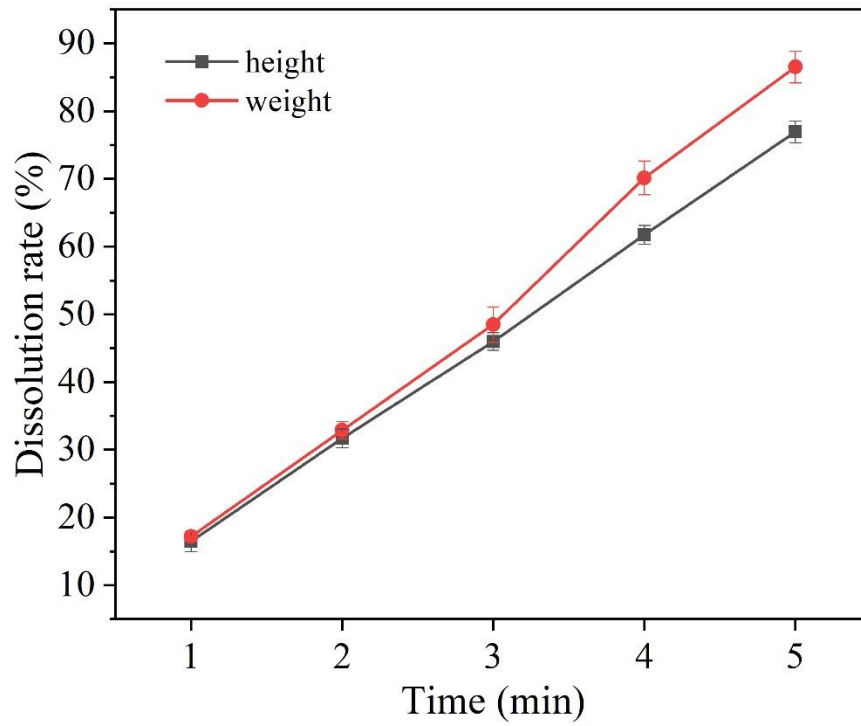

Fig. S2 The dissolution rate of HA MNs patch
